# Supplementary material for: A zwitterionic hydrocarbon-soluble borenium ion based on a β-diketiminate backbone
Source: Royal Society of Chemistry journal article supplement (doi:10.1039/c7cc03121a), 2017-01-01
Supplement: c7cc03121a1.pdf [file c7cc03121a1.pdf]

## **A zwitterionic hydrocarbon-soluble borenium ion based on a $\beta$ -diketiminato backbone**

Joseph A. B. Abdalla, Rémi C. Tirfoin, Haoyu Niu, and Simon Aldridge\*

### **Supporting Information (22 pages total)**

Contents:

|    |                                       |     |
|----|---------------------------------------|-----|
| 1. | General procedures                    | S2  |
| 2. | Preparation of novel compounds        | S3  |
| 3. | Gutmann assays of Lewis acidity       | S14 |
| 4. | Details of DFT calculations           | S15 |
| 5. | DFT run file                          | S16 |
| 6. | Crystallography                       | S21 |
| 6. | References for supporting information | S22 |

## 1. General procedures

All manipulations were carried out using standard Schlenk line or dry-box techniques under an atmosphere of argon. With the exception of fluorobenzene and 1,2-difluorobenzene, solvents were degassed by sparging with argon and dried by passing through a column of the appropriate drying agent using a commercially available Braun SPS. NMR spectra were measured in  $C_6D_6$ ,  $CD_2Cl_2$  or  $C_4D_8O$ ;  $C_6D_6$  was dried over potassium,  $C_4D_8O$  was stirred over potassium overnight and distilled, and  $CD_2Cl_2$  was distilled from calcium hydride and stored over molecular sieves, and all were stored under argon in Teflon valve ampoules. NMR samples were prepared under argon in 5 mm Wilmad 507-PP tubes fitted with J. Young Teflon valves.  $^1H$  and  $^{13}C$  NMR spectra were recorded on Varian Mercury-VX-300 or Bruker AVII-500 spectrometers and referenced internally to residual protio-solvent ( $^1H$ ) or solvent ( $^{13}C$ ) resonances and are reported relative to tetramethylsilane ( $\delta_H = 0$  ppm).  $^{27}Al$  NMR spectra were referenced with respect to  $Al(H_2O)_6^{3+}$ . Chemical shifts are quoted in  $\delta$  (ppm) and coupling constants in Hz. ESI-MS measurements were performed on a Bruker MicroTOF ESI mass spectrometer connected to a glove box by PEEK tubing. Elemental analyses were carried out at London Metropolitan University.  $PhBCl_2$  was distilled prior to use. Starting materials  $Na[BAr^f_4]$ ,<sup>S1</sup>  $C_6F_5BCl_2$ ,<sup>S2</sup>  $B(C_6F_5)_3$ ,<sup>S3</sup>  $K[CH(SiMe_3)_2]$ <sup>S4</sup> and **4-tBu**<sup>S5</sup> were prepared according to literature procedures. The synthesis of **7-tBu** has been communicated previously by us.<sup>S5</sup>

## 2. Preparation of novel compounds

### *[1-Ph][PhBCl<sub>3</sub>]*

(NacNac)<sup>Dipp</sup>Li(OEt<sub>2</sub>) (0.750 g, 1.50 mmol) was dissolved in toluene (15 mL) and cooled to 0 °C. PhBCl<sub>2</sub> (0.39 mL, 3.00 mmol) was added dropwise, and the resulting pale yellow solution stirred at 0 °C for 10 mins. The ice bath was then removed and the reaction mixture allowed to warm to room temperature, and stirred for 90 mins. The mixture was then heated to 70 °C and filtered while hot. Colourless crystals formed at room temperature and the solution was then stored at -30 °C overnight to complete crystallization. The crystals were isolated by filtration and dried *in vacuo*. Yield: 0.730 g, 69%.

**Spectroscopic data:** <sup>1</sup>H NMR (400 MHz, dichloromethane-d<sub>2</sub>, 298 K): δ<sub>H</sub> 0.91 (12H, d, <sup>3</sup>J<sub>HH</sub> = 6.8 Hz, CH<sub>3</sub> of Dipp <sup>i</sup>Pr), 1.21 (12H, d, <sup>3</sup>J<sub>HH</sub> = 6.8 Hz, CH<sub>3</sub> of Dipp <sup>i</sup>Pr), 2.49 (6H, s, CH<sub>3</sub> of β-diketiminato backbone), 2.49 (4H, sept, <sup>3</sup>J<sub>HH</sub> = 6.8 Hz, CH of Dipp <sup>i</sup>Pr), 6.71 (2H, d, *o*-CH, BPh of cation), 6.89 (2H, t, *m*-CH, BPh of cation), 7.10 (3H, overlapping m, *p*-CH, BPh of cation and *o*-CH, BPh of anion), 7.20 (t, 2H, *m*-CH, BPh of anion), 7.25 (4H, d, <sup>3</sup>J<sub>HH</sub> = 7.6 Hz, *m*-CH of Dipp), 7.47 (2H, t, <sup>3</sup>J<sub>HH</sub> = 7.6 Hz, *p*-CH of Dipp), 7.70 (1H, s, γ-CH), 7.78 (d, 1H, *p*-CH, BPh of anion). <sup>13</sup>C{<sup>1</sup>H} NMR (100 MHz, dichloromethane-d<sub>2</sub>, 298 K): δ<sub>C</sub> 23.6, 25.1 (CH<sub>3</sub> of Dipp <sup>i</sup>Pr), 23.6 (CH<sub>3</sub> of β-diketiminato backbone), 29.6 (CH of Dipp <sup>i</sup>Pr), 115.9 (γ-CH), 125.8 (aromatic C, BPh of cation), 126.4 (aromatic C, BPh of anion), 127.1 (aromatic C, BPh of anion), 127.5 (*m*-C of Dipp), 130.8 (aromatic C, BPh of anion), 131.4 (*p*-C of Dipp), 133.9 (aromatic C, BPh of cation), 134.5 (*ipso*-C of Dipp), 134.9 (aromatic C, BPh of cation), 143.6 (*o*-C of Dipp), 172.8 (NC). <sup>11</sup>B{<sup>1</sup>H} NMR (128 MHz, dichloromethane-d<sub>2</sub>, 298 K): δ<sub>B</sub> -6.5 (PhBCl<sub>3</sub><sup>-</sup>), 33.7 (Dipp<sub>2</sub>NacNacBPh<sup>+</sup>). ESI-MS: *m/z* 505.4 ([M]<sup>+</sup>, 100%); accurate mass: calc. 505.3755, meas. 505.3757. Elemental

microanalysis: calc. for  $C_{41}H_{51}N_2B_2Cl_3$ : C 70.36% H 7.34% N 4.00%; meas. C 70.41% H 7.19% N 3.77%.

### ***[1-Ph][BAR<sup>f</sup><sub>4</sub>]***

A solution of [1-Ph][PhBCl<sub>3</sub>] (0.350 g, 0.50 mmol) in dichloromethane (5 mL) was added to a solution of Na[BAR<sup>f</sup><sub>4</sub>] (0.445 g, 0.50 mmol) in dichloromethane (5 mL) at room temperature. A pale yellow solution formed with a colourless precipitate. The reaction mixture was stirred for 30 mins and filtered, and volatiles removed *in vacuo*. The residue was washed with pentane to yield a colourless powder. Yield: 0.550 g, 81%. The exchange of the anion was confirmed by presence of a sharp singlet in the <sup>11</sup>B NMR spectrum at  $\delta_B$  -6.5 ppm, and disappearance of the peak for PhBCl<sub>3</sub><sup>-</sup> at  $\delta_B$  -6.5 ppm. <sup>1</sup>H, <sup>13</sup>C and <sup>11</sup>B data for the cation were identical to that measured for [1-Ph][PhBCl<sub>3</sub>].

**[1-C<sub>6</sub>F<sub>5</sub>]/[(C<sub>6</sub>F<sub>5</sub>)BCl<sub>3</sub>]**

(NacNac)<sup>Dipp</sup>Li(OEt<sub>2</sub>) (0.400 g, 0.80 mmol) was dissolved in toluene (15 mL) and cooled to 0 °C. (C<sub>6</sub>F<sub>5</sub>)BCl<sub>2</sub> (0.40 g, 1.60 mmol) was added dropwise, and the resulting hazy pale yellow solution stirred at 0 °C for 10 mins. The ice bath was then removed and the reaction mixture allowed to warm to room temperature, and stirred for 90 mins. The mixture was then heated to 70 °C and filtered while hot. Removal of volatiles in vacuo yielded an oily yellow residue, which was washed with pentane to yield the product as a colourless powder. Yield: 0.373 g, 53%. Single crystals suitable for X-ray crystallography were obtained from a saturated pentane solution at room temperature.

**Spectroscopic data:** <sup>1</sup>H NMR (500 MHz, dichloromethane-d<sub>2</sub>, 298 K): δ<sub>H</sub> 1.17 (24H, two overlapping doublets, <sup>3</sup>J<sub>HH</sub> = 7.0 Hz, CH<sub>3</sub> of Dipp <sup>i</sup>Pr), 2.57 (4H, sept, <sup>3</sup>J<sub>HH</sub> = 7.0 Hz, CH of Dipp <sup>i</sup>Pr), 2.60 (6H, s, CH<sub>3</sub> of β-diketiminato backbone), 7.30 (4H, d, <sup>3</sup>J<sub>HH</sub> = 7.5 Hz, *m*-CH of Dipp), 7.48 (2H, t, <sup>3</sup>J<sub>HH</sub> = 7.5 Hz, *p*-CH of Dipp), 7.78 (1H, s, γ-CH). <sup>13</sup>C{<sup>1</sup>H} NMR (126 MHz, dichloromethane-d<sub>2</sub>, 298 K): δ<sub>C</sub> 23.9 (CH<sub>3</sub> of β-diketiminato backbone), 24.2, 25.8 (CH<sub>3</sub> of Dipp <sup>i</sup>Pr), 29.5 (CH of Dipp <sup>i</sup>Pr), 117.4 (γ-CH), 126.5 (*m*-C of Dipp), 132.0 (*p*-C of Dipp), 134.7 (*ipso*-C of Dipp), 137.6 (dm, <sup>1</sup>J<sub>CF</sub> = 260 Hz, *m*-CF), 137.7 (dm, <sup>1</sup>J<sub>CF</sub> = 256 Hz, *m*-CF), 140.0 (dm, <sup>1</sup>J<sub>CF</sub> = 248 Hz, *p*-CF), 143.2 (dm, <sup>1</sup>J<sub>CF</sub> = 244 Hz, *p*-CF), 144.3 (*o*-C of Dipp), 146.2 (dm, <sup>1</sup>J<sub>CF</sub> = 244 Hz, *o*-CF), 147.9 (dm, <sup>1</sup>J<sub>CF</sub> = 247 Hz, *o*-CF), 173.6 (NC). <sup>19</sup>F NMR (376 MHz, benzene-d<sub>6</sub>, 298 K): δ<sub>F</sub> -124.7 (d, <sup>3</sup>J<sub>FF</sub> = 18.8 Hz, *o*-CF of C<sub>6</sub>F<sub>5</sub>BCl<sub>3</sub><sup>-</sup>), -131.6 (d, <sup>3</sup>J<sub>FF</sub> = 23.3 Hz, *o*-CF of Dipp<sub>2</sub>NacNacB(C<sub>6</sub>F<sub>5</sub>)<sup>+</sup>), -147.2 (t, <sup>3</sup>J<sub>FF</sub> = 20.7 Hz, *p*-CF of C<sub>6</sub>F<sub>5</sub>BCl<sub>3</sub><sup>-</sup>), -159.8 (t, <sup>3</sup>J<sub>FF</sub> = 17.7 Hz, *p*-CF of Dipp<sub>2</sub>NacNacB(C<sub>6</sub>F<sub>5</sub>)<sup>+</sup>), -160.5 (m, *m*-CF of Dipp<sub>2</sub>NacNacB(C<sub>6</sub>F<sub>5</sub>)<sup>+</sup>), -147.2 (m, *m*-CF of C<sub>6</sub>F<sub>5</sub>BCl<sub>3</sub><sup>-</sup>). <sup>11</sup>B{<sup>1</sup>H} NMR (128 MHz, dichloromethane-d<sub>2</sub>, 298 K): δ<sub>B</sub> -5.0 (C<sub>6</sub>F<sub>5</sub>BCl<sub>3</sub><sup>-</sup>), 32.0 (Dipp<sub>2</sub>NacNacB(C<sub>6</sub>F<sub>5</sub>)<sup>+</sup>). ESI-MS (+ve): *m/z* 595.3 ([M]<sup>+</sup>, 100%); accurate mass: calc. 595.3282, meas. 595.3284; (-ve):

$m/z$  282.9 ( $[M]^+$ , 100%); Elemental microanalysis: calc. for  $C_{41}H_{41}N_2B_2F_{10}Cl_3$ : C 55.98% H 4.70% N 3.18%; meas. C 55.82% H 4.83% N 2.65%.

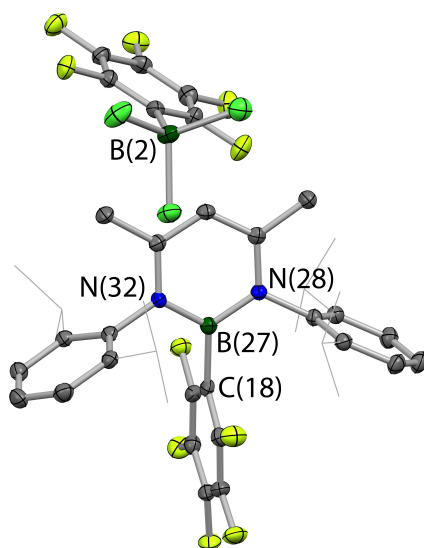

Figure S1: Molecular structure of  $[1-C_6F_5][C_6F_5BCl_3]$  as determined by X-ray crystallography. Hydrogen atoms have been omitted and selected substituents shown in wireframe format for clarity; thermal ellipsoids have been depicted at the 40% probability level. Key bond lengths ( $\text{\AA}$ ) and angles ( $^\circ$ ): B-C 1.586(4), B-N 1.437(4), 1.442(4), C-N 1.368(4), 1.369(4), N-B-N 117.5(3), N-B-C 121.1(3), 122.2(3).

## 2-Ph

[1-Ph][BAr<sup>f</sup><sub>4</sub>] (0.150 g, 0.11 mmol) was dissolved in THF (10 mL) and cooled to -78 °C. <sup>t</sup>BuLi (1.9M in pentane, 0.11 mL, 0.22 mmol) was added dropwise and the solution instantly turned pale brown. The reaction mixture was allowed to warm to room temperature and stirred for 2 h. Volatiles were removed *in vacuo* and the residue extracted into toluene. Removal of the toluene *in vacuo* yielded a yellow oil, which was used without further purification. <sup>1</sup>H and <sup>13</sup>C NMR indicated *ca.* 95% conversion to 2-Ph.

**Spectroscopic data:** <sup>1</sup>H NMR (400 MHz, benzene-d<sub>6</sub>, 298 K): δ<sub>H</sub> 0.92 (6H, d, <sup>3</sup>J<sub>HH</sub> = 6.8 Hz, CH<sub>3</sub> of Dipp <sup>i</sup>Pr), 1.07 (6H, d, <sup>3</sup>J<sub>HH</sub> = 6.8 Hz, CH<sub>3</sub> of Dipp <sup>i</sup>Pr), 1.11 (6H, d, <sup>3</sup>J<sub>HH</sub> = 6.8 Hz, CH<sub>3</sub> of Dipp <sup>i</sup>Pr), 1.37 (6H, d, <sup>3</sup>J<sub>HH</sub> = 6.8 Hz, CH<sub>3</sub> of Dipp <sup>i</sup>Pr), 1.49 (3H, s, CH<sub>3</sub> of β-diketiminato backbone), 3.31 (1H, s, C=CH<sub>2</sub>), 3.40 (2H, sept, <sup>3</sup>J<sub>HH</sub> = 6.8 Hz, CH of Dipp <sup>i</sup>Pr), 3.55 (2H, sept, <sup>3</sup>J<sub>HH</sub> = 6.8 Hz, CH of Dipp <sup>i</sup>Pr), 3.98 (1H, s, C=CH<sub>2</sub>), 5.70 (1H, s, □-CH), 6.70-7.13 (11H, m, aromatic CH). <sup>13</sup>C{<sup>1</sup>H} NMR (126 MHz, benzene-d<sub>6</sub>, 298 K): δ<sub>C</sub> 20.9 (CH<sub>3</sub> of β-diketiminato backbone), 24.0, 24.1, 25.2, 26.5 (CH<sub>3</sub> of Dipp <sup>i</sup>Pr), 28.8, 29.1 (CH of Dipp <sup>i</sup>Pr), 85.1 (C=CH<sub>2</sub>), 108.5 (γ-CH), 124.6, 125.0, 126.6, 134.6, 139.1, 140.0, 141.4, 146.4, 147.0, 148.4 (ArC and NC). <sup>11</sup>B{<sup>1</sup>H} NMR (128 MHz, benzene-d<sub>6</sub>, 298 K): δ<sub>B</sub> 31.3.

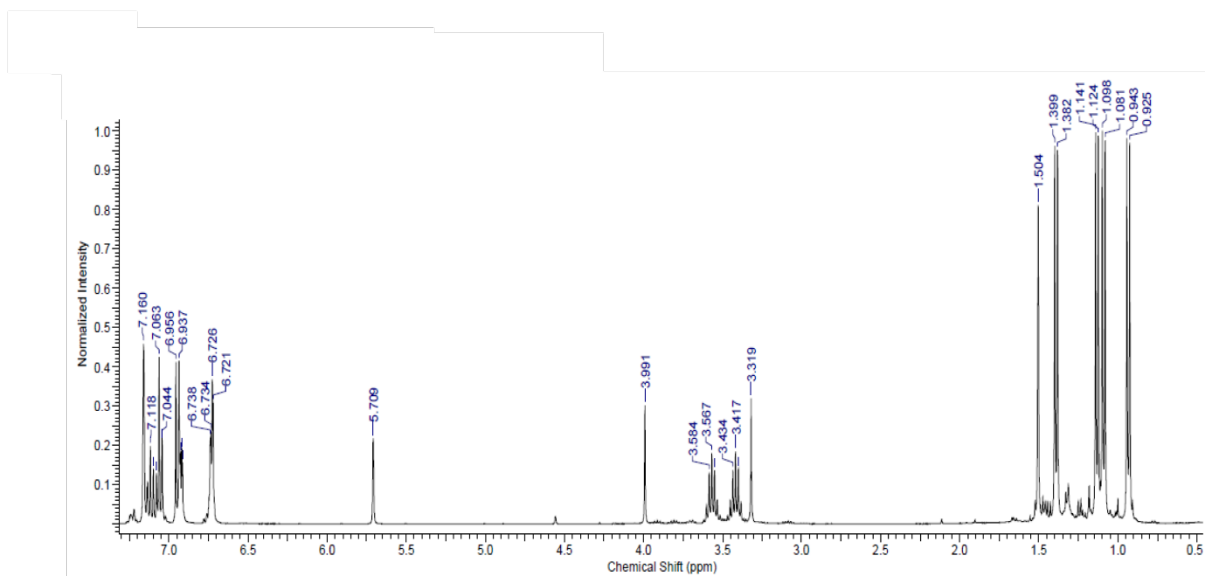

Figure S2:  $^1\text{H}$  NMR spectrum of 2-Ph.

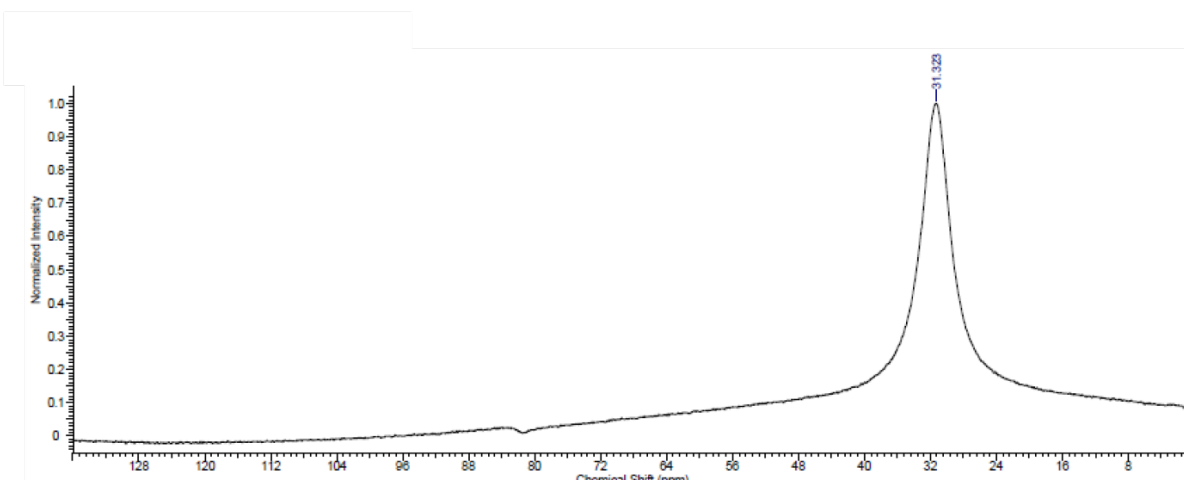

Figure S3:  $^{11}\text{B}$  NMR spectrum of 2-Ph.

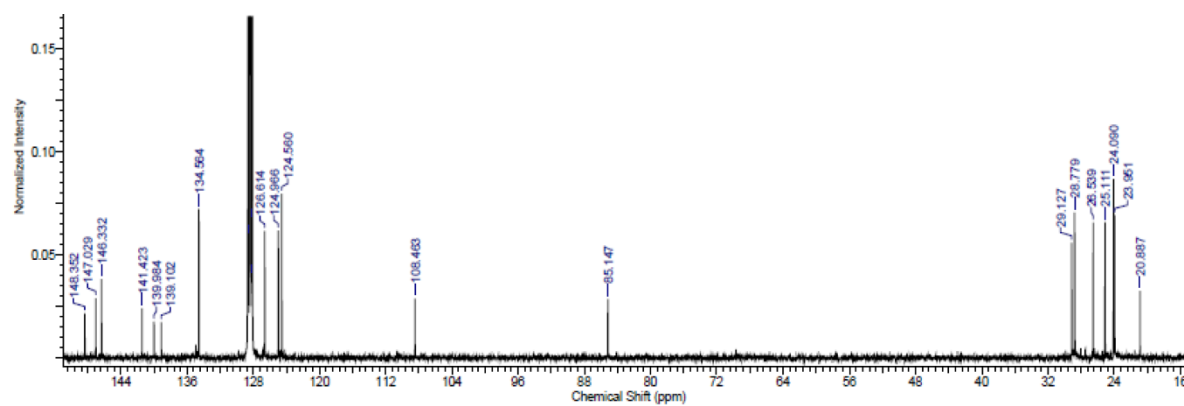

Figure S4:  $^{13}\text{C}$  NMR spectrum of 2-Ph.



### 3-Ph

[1-Ph][BAr<sup>f</sup><sub>4</sub>] (0.490 g, 0.36 mmol) was dissolved in THF (10 mL) and cooled to -78 °C. <sup>t</sup>BuLi (1.9M in pentane, 0.38 mL, 0.72 mmol) was added dropwise and the solution instantly turned pale brown. The reaction mixture was allowed to warm to room temperature and stirred overnight. Volatiles were removed *in vacuo* and the residue extracted into toluene and filtered on to solid B(C<sub>6</sub>F<sub>5</sub>)<sub>3</sub> (0.180 g, 0.36 mmol) to yield a pale yellow solution. The reaction mixture was stirred room temperature for 3 h, before being concentrated to the point of incipient crystallization. Storage overnight at -30 °C yielded the product as colourless crystals. Yield: 0.160 g, 44%.

**Spectroscopic data:** <sup>1</sup>H NMR (400 MHz, benzene-d<sub>6</sub>, 298 K): δ<sub>H</sub> 0.56 (6H, d, <sup>3</sup>J<sub>HH</sub> = 6.8 Hz, CH<sub>3</sub> of Dipp <sup>i</sup>Pr), 0.58 (6H, d, <sup>3</sup>J<sub>HH</sub> = 6.8 Hz, CH<sub>3</sub> of Dipp <sup>i</sup>Pr), 0.85 (6H, d, <sup>3</sup>J<sub>HH</sub> = 6.8 Hz, CH<sub>3</sub> of Dipp <sup>i</sup>Pr), 1.41 (6H, d, <sup>3</sup>J<sub>HH</sub> = 6.8 Hz, CH<sub>3</sub> of Dipp <sup>i</sup>Pr), 1.61 (CH<sub>3</sub> of β-diketiminato backbone), 2.08 (2H, sept, <sup>3</sup>J<sub>HH</sub> = 6.8 Hz, CH of Dipp <sup>i</sup>Pr), 2.58 (2H, sept, <sup>3</sup>J<sub>HH</sub> = 6.8 Hz, CH of Dipp <sup>i</sup>Pr), 3.23 (2H, s, CH<sub>2</sub>B), 6.40 (2H, d, <sup>3</sup>J<sub>HH</sub> = 8.0 Hz, *o*-CH of Ph), 6.48 (1H, t, <sup>3</sup>J<sub>HH</sub> = 8.0 Hz, *p*-CH of Dipp), 6.61 (1H, t, <sup>3</sup>J<sub>HH</sub> = 8.0 Hz, *p*-CH of Dipp), 6.74 (2H, d, <sup>3</sup>J<sub>HH</sub> = 8.0 Hz, *m*-CH of Dipp), 6.91 (2H, d, <sup>3</sup>J<sub>HH</sub> = 8.0 Hz, *m*-CH of Dipp), 7.05 (m, 3H, *m*-CH and *p*-CH of Ph), 7.60 (s, 1H, γ-CH). <sup>13</sup>C{<sup>1</sup>H} NMR (126 MHz, benzene-d<sub>6</sub>, 298 K): δ<sub>C</sub> 22.2 (CH<sub>3</sub> of β-diketiminato backbone), 22.9, 23.9, 24.1, 24.7 (CH<sub>3</sub> of Dipp <sup>i</sup>Pr), 26.8 (CH<sub>2</sub>B), 29.4, 29.5 (CH of Dipp <sup>i</sup>Pr), 115.4 (γ-CH), 125.8, 126.2, 127.3, 128.9, 129.7, 130.5, 131.0, 131.3, 135.5 (*ipso*-C, *m*-C and *p*-C of Dipp and ArC of Ph), 143.7, 144.1 (*o*-C of Dipp), 137.2 (dm, <sup>1</sup>J<sub>CF</sub> = 250 Hz, *m*-CF), 139.0 (dm, <sup>1</sup>J<sub>CF</sub> = 244 Hz, *p*-CF), 148.9 (dm, <sup>1</sup>J<sub>CF</sub> = 250 Hz, *o*-CF), 167.6, 186.9 (NC). <sup>19</sup>F NMR (376 MHz, benzene-d<sub>6</sub>, 298 K): δ<sub>F</sub> -131.4 (br s, *o*-CF), -160.1 (br s, *m*-CF), -164.9 (br s, *p*-CF). <sup>11</sup>B{<sup>1</sup>H} NMR (128 MHz, benzene-d<sub>6</sub>, 298 K): δ<sub>B</sub> -14.4

(-B(C<sub>6</sub>F<sub>5</sub>)<sub>3</sub>), 32.9 (-BPh). Elemental microanalysis: calc. for C<sub>53</sub>H<sub>45</sub>N<sub>2</sub>B<sub>2</sub>F<sub>15</sub>: C 62.62% H 4.46% N 2.76%; meas. C 62.45% H 4.06% N 2.57%.

***[K(OEt)<sub>2</sub>][6-tBu Cl]***

Benzene (10 mL) was added to 4-tBu (0.150 g, 0.28 mmol) and K[CH(SiMe<sub>3</sub>)<sub>2</sub>] (0.090 g, 0.45 mmol) and the resulting mixture stirred for 10 mins at room temperature. The solution was filtered onto a solution of B(C<sub>6</sub>F<sub>5</sub>)<sub>3</sub> (0.142 g, 0.28 mmol) in benzene (5 mL), and the clear, pale yellow solution stirred for 30 mins. Volatiles were removed *in vacuo* and the residue washed with toluene to yield a beige powder. Yield: 0.211 g, 61%. This solid was extracted into diethyl ether and hexane was added until the solution became cloudy. Storage at -30 °C for several days yielded colourless crystals, suitable for X-ray crystallography. Exposure to vacuum results in loss of coordinated diethyl ether – however, a small amount (*ca.* 10%) remains even after extended exposure to vacuum.

***Spectroscopic data:*** <sup>1</sup>H NMR (400 MHz, thf-d<sub>8</sub>, 298 K): δ<sub>H</sub> 0.40 (9H, s, CH<sub>3</sub> of <sup>t</sup>Bu), 0.83 (3H, d, <sup>3</sup>J<sub>HH</sub> = 6.8 Hz, CH<sub>3</sub> of Dipp <sup>i</sup>Pr), 1.06 (3H, d, <sup>3</sup>J<sub>HH</sub> = 6.8 Hz, CH<sub>3</sub> of Dipp <sup>i</sup>Pr), 1.10 (3H, d, <sup>3</sup>J<sub>HH</sub> = 6.8 Hz, CH<sub>3</sub> of Dipp <sup>i</sup>Pr), 1.12 (3H, d, <sup>3</sup>J<sub>HH</sub> = 6.8 Hz, CH<sub>3</sub> of Dipp <sup>i</sup>Pr), 1.27 (3H, d, <sup>3</sup>J<sub>HH</sub> = 6.8 Hz, CH<sub>3</sub> of Dipp <sup>i</sup>Pr), 1.30 (3H, d, <sup>3</sup>J<sub>HH</sub> = 6.8 Hz, CH<sub>3</sub> of Dipp <sup>i</sup>Pr), 1.33 (3H, d, <sup>3</sup>J<sub>HH</sub> = 6.8 Hz, CH<sub>3</sub> of Dipp <sup>i</sup>Pr), 1.43 (3H, d, <sup>3</sup>J<sub>HH</sub> = 6.8 Hz, CH<sub>3</sub> of Dipp <sup>i</sup>Pr), 1.61 (3H, s, CH<sub>3</sub> of β-diketiminato backbone), 1.99 (1H, d, <sup>2</sup>J<sub>HH</sub> = 19.2 Hz, CH<sub>2</sub>B), 2.71 (1H, d, <sup>2</sup>J<sub>HH</sub> = 19.2 Hz, CH<sub>2</sub>B), 3.09 (1H, sept, <sup>3</sup>J<sub>HH</sub> = 6.8 Hz, CH of Dipp <sup>i</sup>Pr), 3.21 (1H, sept, <sup>3</sup>J<sub>HH</sub> = 6.8 Hz, CH of Dipp <sup>i</sup>Pr), 3.71 (1H, sept, <sup>3</sup>J<sub>HH</sub> = 6.8 Hz, CH of Dipp <sup>i</sup>Pr), 3.81 (1H, sept, <sup>3</sup>J<sub>HH</sub> = 6.8 Hz, CH of Dipp <sup>i</sup>Pr), 5.79 (γ-CH), 7.06-7.23 (6H, m, aromatic CH). <sup>13</sup>C{<sup>1</sup>H} NMR (126 MHz, thf-d<sub>8</sub>, 298 K): δ<sub>C</sub> 23.8 (CH<sub>3</sub> of β-diketiminato backbone), 24.1, 24.6, 25.1, 25.3, 25.6, 25.8, 26.0, 28.0 (CH<sub>3</sub> of Dipp <sup>i</sup>Pr), 28.5, 28.5, 29.9, 30.2 (CH of Dipp <sup>i</sup>Pr), 32.4 (CH<sub>3</sub> of <sup>t</sup>Bu), 101.9 (γ-CH), 124.1, 124.2, 125.6, 125.8, 127.3, 127.4, 142.4, 143.0, 143.4, 144.7, 146.8, 147.6 (ArC), 168.8, 182.8 (NC). C-F carbons not observed. <sup>11</sup>B{<sup>1</sup>H} NMR (128 MHz, thf-d<sub>8</sub>, 298 K): δ<sub>B</sub> -14.4. <sup>19</sup>F NMR (376 MHz, thf-d<sub>8</sub>, 298 K): δ<sub>F</sub> -129.8 (br s, *o*-F), -165.5 (br s, *p*-F),

-168.3 (br s, *m*-F). Elemental microanalysis: calc. for C<sub>51</sub>H<sub>49</sub>N<sub>2</sub>AlClBF<sub>15</sub>K (no coordinated diethyl ether): C 57.34% H 4.54% N 2.58%; meas. C 57.86% H 3.93% N 2.87%.

### **7-*t*BuNH<sub>3</sub>**

7-*t*Bu (0.300 g, 0.28 mmol) was dissolved in fluorobenzene (10 mL) and ammonia gas was bubbled through the solution for 2 min. The reaction mixture was then left to stir for 12 h, during which time it turned slightly cloudy. Volatiles were removed *in vacuo* and the residue extracted into minimal dichloromethane (ca. 15 mL). The solution was filtered and stored at -30°C for 12 h to yield a colorless, microcrystalline solid. Yield : 0.245 g, 80%. Single crystals suitable for X-ray crystallography were obtained by layering a concentrated dichloromethane solution with hexane and storing at room temperature for several days.

**Spectroscopic data** : <sup>1</sup>H NMR (500 MHz, THF-d<sub>8</sub>, 298 K): δ<sub>H</sub> 0.55 (9H, s, CH<sub>3</sub> of *t*Bu), 0.79 (3H, d, = 7.5 Hz, CH<sub>3</sub> of Dipp <sup>i</sup>Pr), 1.02 (3H, d, = 7.5 Hz, CH<sub>3</sub> of Dipp <sup>i</sup>Pr), 1.25 (3H, d, <sup>3</sup>J<sub>HH</sub> = 7.5 Hz, CH<sub>3</sub> of Dipp <sup>i</sup>Pr), 1.28 (3H, d, <sup>3</sup>J<sub>HH</sub> = 7.5 Hz, CH<sub>3</sub> of Dipp <sup>i</sup>Pr), 1.29 – 1.33 (12H, 4 overlapping doublets, <sup>3</sup>J<sub>HH</sub> = 7.5 Hz, CH<sub>3</sub> of Dipp <sup>i</sup>Pr), 1.57 (3H, d, <sup>3</sup>J<sub>HH</sub> = 6.8 Hz, CH<sub>3</sub> of Dipp <sup>i</sup>Pr), 1.69 (3H, s, CH<sub>3</sub> of β-diketiminato backbone), 2.65 (1H, sept, <sup>3</sup>J<sub>HH</sub> = 6.8 Hz, CH of Dipp <sup>i</sup>Pr), 2.78 – 2.92 (5H, overlapping multiplets, CH of Dipp <sup>i</sup>Pr and C(CH<sub>2</sub>)B), 3.11 (1H, sept, <sup>3</sup>J<sub>HH</sub> = 7.5 Hz, CH of Dipp <sup>i</sup>Pr), 3.85 (3H, br s, NH<sub>3</sub>), 5.70 (1H, s, γ-CH), 7.23 – 7.34 (6H, m, aromatic CH). <sup>13</sup>C {<sup>1</sup>H} NMR (126 MHz, THF-d<sub>8</sub>, 298 K): δ<sub>C</sub> 23.5 (CH<sub>3</sub> of β-diketiminato backbone), 24.0, 24.1, 24.7, 24.9, 24.9, 25.4, 26.0, 26.7 (CH<sub>3</sub> of Dipp <sup>i</sup>Pr), 29.2 (CH of Dipp <sup>i</sup>Pr), 29.3 (CH of Dipp <sup>i</sup>Pr), 30.3 (CH of Dipp <sup>i</sup>Pr), 30.8 (CH of Dipp <sup>i</sup>Pr), 30.9 (CH<sub>3</sub> of *t*Bu), 100.3 (γ-CH), 125.6, 125.6, 125.7, 125.9, 128.8, 128.9 (ArC), 137.4 (dm, <sup>1</sup>J<sub>CF</sub> = 248 Hz, *m*-CF), 139.3 (dm, <sup>1</sup>J<sub>CF</sub> = 219 Hz, *p*-CF), 149.4 (dm, <sup>1</sup>J<sub>CF</sub> = 236 Hz, *o*-CF), 141.4, 141.8, 142.9, 144.3, 144.7, 144.8 (ArC), 170.2 (NC), 183.7 (NC). <sup>11</sup>B NMR (160 MHz, THF-d<sub>8</sub>, 298 K): δ<sub>B</sub> -14.9. <sup>19</sup>F NMR (470 MHz, THF-d<sub>8</sub>, 298 K): δ<sub>F</sub> -132.2 (d, <sup>2</sup>J<sub>FF</sub> = 28.6 Hz, *ortho*-F), -163.3 (t, <sup>3</sup>J<sub>FF</sub> = 20.7 Hz, *para*-F), -168.0 (m, *meta*-F). Elemental microanalysis : calcd. for C<sub>51</sub>H<sub>52</sub>N<sub>3</sub>GaBF<sub>15</sub>: C 57.11%, H 4.89%, N 3.92% meas. C 56.67%, H 4.80%, N 3.89%.

### 3. Gutmann assay of Lewis acidity

Gutmann tests were performed on **3-Ph** and **7-tBu** by mixing the two equivalents of the compound with Et<sub>3</sub>PO in CD<sub>2</sub>Cl<sub>2</sub>. A single resonance was observed in the <sup>31</sup>P NMR spectrum in each case. The acceptor number was calculated as A.N. = 2.21 x ((δ<sub>P</sub> (Lewis acid + Et<sub>3</sub>PO) – 41).

Dipp<sub>2</sub>NacNac<sup>(BC<sub>6</sub>F<sub>5</sub>)<sub>3</sub></sup>BPh: δ<sub>P</sub> +77.0, A.N. = 79.6.

Dipp<sub>2</sub>NacNac<sup>(BC<sub>6</sub>F<sub>5</sub>)<sub>3</sub></sup>Ga(<sup>t</sup>Bu): δ<sub>P</sub> +71.5, A.N. = 67.6.

#### **4. Details of DFT calculations**

DFT calculations were performed using the Amsterdam Density Functional (ADF) 2014 software package. Calculations were performed using the Vosko-Wilk-Nusair local density approximation with exchange from Becke,<sup>S7</sup> and correlation correction from Perdew,<sup>S8</sup> and 3-dimensional dispersion effect (BP86-D3). Slater-type orbitals (STOs)<sup>S9</sup> were used for the triple zeta basis set with an additional set of polarization functions (TZP). The full-electron basis set approximation was applied with no molecular symmetry. General numerical quality was good.

## 5. DFT run file

```
#!/bin/sh

# =====
# 3-Ph
# =====

"$ADFBIN/adf" <<eor
ATOMS
1 F      5.549435000000    10.894155000000    4.662147000000
2 C      5.268911000000    9.777248000000    3.948363000000
3 C      5.569538000000    9.846510000000    2.605531000000
4 F      6.129480000000    10.945481000000    2.073775000000
5 C      5.260980000000    8.779153000000    1.784724000000
6 F      5.489125000000    8.842199000000    0.464711000000
7 C      4.674295000000    7.665264000000    2.340714000000
8 F      4.355040000000    6.629163000000    1.546619000000
9 C      4.402993000000    7.637026000000    3.699291000000
10 C     4.675033000000    8.685559000000    4.577059000000
11 B     4.189972000000    8.805792000000    6.159942000000
12 C     5.482485000000    9.281752000000    7.097325000000
13 C     5.298973000000    9.207694000000    8.584152000000
14 N     6.377912000000    9.103977000000    9.410443000000
15 C     7.689422000000    9.432532000000    8.868604000000
16 C     8.634647000000    8.418453000000    8.633153000000
17 C     9.926791000000    8.821065000000    8.277234000000
18 C    10.254162000000    10.162278000000    8.142438000000
19 C     9.286805000000    11.133023000000    8.336849000000
20 C     7.980828000000    10.799141000000    8.704797000000
21 C     6.971052000000    11.911253000000    8.943078000000
22 C     6.926234000000    12.902600000000    7.771306000000
23 C     7.237928000000    12.649702000000    10.260438000000
24 C     8.317420000000    6.935518000000    8.717887000000
25 C     9.102187000000    6.244843000000    9.835352000000
26 C     8.624134000000    6.243778000000    7.383015000000
27 B     6.252497000000    8.814317000000    10.832880000000
28 N     4.880124000000    8.712198000000    11.311743000000
29 C     3.821841000000    9.014646000000    10.510925000000
30 C     4.036523000000    9.235754000000    9.163493000000
31 C     2.431947000000    9.083199000000    11.066208000000
32 C     4.598677000000    8.321485000000    12.687478000000
33 C     4.819998000000    9.248897000000    13.704996000000
34 C     5.274259000000    10.667897000000    13.432396000000
35 C     6.420701000000    11.096261000000    14.348727000000
36 C     4.092222000000    11.638287000000    13.543842000000
37 C     4.582632000000    8.821598000000    15.014572000000
38 C     4.175586000000    7.519635000000    15.280626000000
39 C     3.961458000000    6.635379000000    14.243650000000
40 C     4.158618000000    7.008866000000    12.922576000000
41 C     3.914243000000    5.994609000000    11.802104000000
42 C     2.575805000000    5.278005000000    11.947160000000
43 C     5.033388000000    4.958331000000    11.691189000000
44 C     7.486545000000    8.628373000000    11.800158000000
45 C     8.600895000000    9.478352000000    11.780522000000
46 C     9.675961000000    9.292763000000    12.640600000000
47 C     9.680572000000    8.234285000000    13.536058000000
48 C     8.600157000000    7.363882000000    13.569492000000
```



|       |                 |                 |                 |
|-------|-----------------|-----------------|-----------------|
| 49 C  | 7.512919000000  | 7.572203000000  | 12.725865000000 |
| 50 C  | 2.964777000000  | 9.920746000000  | 6.033283000000  |
| 51 C  | 3.000003000000  | 11.244909000000 | 6.445986000000  |
| 52 F  | 4.046298000000  | 11.729571000000 | 7.155701000000  |
| 53 C  | 2.020659000000  | 12.180490000000 | 6.159411000000  |
| 54 F  | 2.150132000000  | 13.461320000000 | 6.558140000000  |
| 55 C  | 0.908153000000  | 11.801321000000 | 5.450227000000  |
| 56 F  | -0.061232000000 | 12.691792000000 | 5.183642000000  |
| 57 C  | 0.804870000000  | 10.487458000000 | 5.027441000000  |
| 58 C  | 1.822577000000  | 9.605867000000  | 5.301102000000  |
| 59 F  | 1.681485000000  | 8.359846000000  | 4.809149000000  |
| 60 F  | -0.280340000000 | 10.094436000000 | 4.333293000000  |
| 61 C  | 3.724091000000  | 7.349852000000  | 6.780500000000  |
| 62 C  | 4.647737000000  | 6.303628000000  | 6.818710000000  |
| 63 F  | 5.823872000000  | 6.438246000000  | 6.159411000000  |
| 64 C  | 4.457032000000  | 5.113906000000  | 7.488446000000  |
| 65 F  | 5.429737000000  | 4.188092000000  | 7.532848000000  |
| 66 C  | 3.255998000000  | 4.874505000000  | 8.121387000000  |
| 67 F  | 3.047772000000  | 3.703253000000  | 8.741061000000  |
| 68 C  | 2.291224000000  | 5.844540000000  | 8.095029000000  |
| 69 C  | 2.542238000000  | 7.045983000000  | 7.454305000000  |
| 70 F  | 1.553856000000  | 7.960963000000  | 7.553368000000  |
| 71 F  | 1.115088000000  | 5.638350000000  | 8.703028000000  |
| 72 F  | 3.800078000000  | 6.502537000000  | 4.124731000000  |
| 73 H  | 5.641836000000  | 10.211827000000 | 6.888408000000  |
| 74 H  | 6.265223000000  | 8.737772000000  | 6.844184000000  |
| 75 H  | 10.573601000000 | 8.162358000000  | 8.135539000000  |
| 76 H  | 11.165634000000 | 10.419616000000 | 7.898496000000  |
| 77 H  | 9.511261000000  | 12.035749000000 | 8.246985000000  |
| 78 H  | 6.084478000000  | 11.486974000000 | 9.027105000000  |
| 79 H  | 6.193294000000  | 13.500924000000 | 7.891420000000  |
| 80 H  | 7.762827000000  | 13.369502000000 | 7.721598000000  |
| 81 H  | 6.781638000000  | 12.389167000000 | 6.978626000000  |
| 82 H  | 6.490232000000  | 13.230976000000 | 10.396295000000 |
| 83 H  | 8.068988000000  | 13.133298000000 | 10.169866000000 |
| 84 H  | 7.272233000000  | 11.982470000000 | 10.958831000000 |
| 85 H  | 7.375516000000  | 6.841036000000  | 8.931580000000  |
| 86 H  | 8.740327000000  | 5.366981000000  | 9.906288000000  |
| 87 H  | 8.976403000000  | 6.729150000000  | 10.651029000000 |
| 88 H  | 10.016611000000 | 6.217671000000  | 9.573720000000  |
| 89 H  | 8.194403000000  | 5.374085000000  | 7.412026000000  |
| 90 H  | 9.588724000000  | 6.157288000000  | 7.284660000000  |
| 91 H  | 8.236822000000  | 6.755790000000  | 6.676131000000  |
| 92 H  | 3.286614000000  | 9.343378000000  | 8.609626000000  |
| 93 H  | 1.860939000000  | 8.783948000000  | 10.376837000000 |
| 94 H  | 2.189232000000  | 9.966744000000  | 11.339162000000 |
| 95 H  | 2.373666000000  | 8.462497000000  | 11.809710000000 |
| 96 H  | 5.621548000000  | 10.694891000000 | 12.504920000000 |
| 97 H  | 6.785327000000  | 11.945174000000 | 14.049239000000 |
| 98 H  | 6.090011000000  | 11.190387000000 | 15.225611000000 |
| 99 H  | 7.132063000000  | 10.428496000000 | 14.351735000000 |
| 100 H | 4.441171000000  | 12.515261000000 | 13.320419000000 |
| 101 H | 3.723722000000  | 11.614844000000 | 14.452567000000 |
| 102 H | 3.404652000000  | 11.375088000000 | 12.911785000000 |
| 103 H | 4.723355000000  | 9.400209000000  | 15.701466000000 |
| 104 H | 4.040949000000  | 7.254837000000  | 16.138405000000 |
| 105 H | 3.677614000000  | 5.768351000000  | 14.440184000000 |
| 106 H | 3.847293000000  | 6.501826000000  | 10.944679000000 |
| 107 H | 2.462194000000  | 4.736512000000  | 11.171109000000 |
| 108 H | 2.606052000000  | 4.747168000000  | 12.726042000000 |

|       |                 |                 |                 |
|-------|-----------------|-----------------|-----------------|
| 109 H | 1.897826000000  | 5.944172000000  | 12.000760000000 |
| 110 H | 4.870902000000  | 4.388422000000  | 10.932296000000 |
| 111 H | 4.931765000000  | 4.427493000000  | 12.511996000000 |
| 112 H | 5.907421000000  | 5.354550000000  | 11.664654000000 |
| 113 H | 8.579870000000  | 10.210052000000 | 11.215333000000 |
| 114 H | 10.422365000000 | 9.860185000000  | 12.580986000000 |
| 115 H | 10.403922000000 | 8.119735000000  | 14.097002000000 |
| 116 H | 8.579870000000  | 6.635024000000  | 14.130612000000 |
| 117 H | 6.803770000000  | 6.990218000000  | 12.786187000000 |

END

#### GUIBONDS

1 1 2 1.0  
 2 2 3 1.5  
 3 2 10 1.0  
 4 3 4 1.0  
 5 3 5 1.5  
 6 5 6 1.0  
 7 5 7 1.5  
 8 7 8 1.0  
 9 7 9 1.5  
 10 9 72 1.0  
 11 9 10 1.5  
 12 10 11 1.5  
 13 11 61 1.0  
 14 11 50 1.0  
 15 11 12 1.0  
 16 12 73 1.0  
 17 12 74 1.0  
 18 12 13 1.0  
 19 13 14 1.0  
 20 13 30 1.5  
 21 14 15 1.0  
 22 14 27 1.0  
 23 15 16 1.5  
 24 15 20 1.5  
 25 16 17 1.5  
 26 16 24 1.0  
 27 17 75 1.0  
 28 17 18 1.5  
 29 18 76 1.0  
 30 18 19 1.5  
 31 19 77 1.0  
 32 19 20 1.5  
 33 20 21 1.0  
 34 21 78 1.0  
 35 21 23 1.0  
 36 21 22 1.0  
 37 22 79 1.0  
 38 22 81 1.0  
 39 22 80 1.0  
 40 23 82 1.0  
 41 23 83 1.0  
 42 23 84 1.0  
 43 24 85 1.0  
 44 24 25 1.0  
 45 24 26 1.0  
 46 25 88 1.0  
 47 25 86 1.0  
 48 25 87 1.0

49 26 91 1.0  
50 26 89 1.0  
51 26 90 1.0  
52 27 28 1.0  
53 27 44 3  
54 28 29 1.0  
55 28 32 1.0  
56 29 30 1.5  
57 29 31 1.0  
58 30 92 1.0  
59 31 93 1.0  
60 31 94 1.0  
61 31 95 1.0  
62 32 33 1.5  
63 32 40 1.5  
64 33 37 1.5  
65 33 34 1.0  
66 34 96 1.0  
67 34 35 1.0  
68 34 36 1.0  
69 35 98 1.0  
70 35 97 1.0  
71 35 99 1.0  
72 36 100 1.0  
73 36 102 1.0  
74 36 101 1.0  
75 37 103 1.0  
76 37 38 1.5  
77 38 104 1.0  
78 38 39 1.5  
79 39 105 1.0  
80 39 40 1.5  
81 40 41 1.0  
82 41 106 1.0  
83 41 42 1.0  
84 41 43 1.0  
85 42 108 1.0  
86 42 109 1.0  
87 42 107 1.0  
88 43 112 1.0  
89 43 110 1.0  
90 43 111 1.0  
91 44 45 1.0  
92 44 49 1.0  
93 45 113 1.0  
94 45 46 1.5  
95 46 114 1.0  
96 46 47 1.5  
97 47 115 1.0  
98 47 48 1.5  
99 48 116 1.0  
100 48 49 1.5  
101 49 117 1.0  
102 50 51 1.5  
103 50 58 1.5  
104 51 52 1.0  
105 51 53 1.5  
106 53 54 1.0  
107 53 55 1.5  
108 55 56 1.0

```
109 55 57 1.5
110 57 60 1.0
111 57 58 1.5
112 58 59 1.0
113 61 69 1.5
114 61 62 1.5
115 62 63 1.0
116 62 64 1.5
117 64 65 1.0
118 64 66 1.5
119 66 67 1.0
120 66 68 1.5
121 68 71 1.0
122 68 69 1.5
123 69 70 1.0
END
```

```
BASIS
type TZP
core None
createoutput None
END
```

```
XC
GGA Becke88 Perdew86
DISPERSION Grimme3
END
```

```
GEOMETRY
  optim Delocalized
END
```

```
SAVE TAPE21 TAPE13
```

```
NumericalQuality Good
```

```
NOPRINT LOGFILE
```

```
eor
```

## 6. Crystallography

Details of the data collection, structure solution and refinement procedures relating to the X-ray crystal structures of **[1-Ph][PhBCl<sub>3</sub>]**, **[1-C<sub>6</sub>F<sub>5</sub>][(C<sub>6</sub>F<sub>5</sub>)BCl<sub>3</sub>]**, **3-Ph**, **[K(OEt<sub>2</sub>)<sub>2</sub>][6-tBu·Cl]**, **7-tBu·NH<sub>3</sub>** and **(Nacnac<sup>BCF</sup>)<sup>Dipp</sup>Al(thf)Me** are included in the respective CIFs. These are included as part of the online supplementary material and are also available from the Cambridge crystallographic Data Centre (CCDC), reference numbers 1038762 and 1544787-1544791.

## 7. References

- S1. D. L. Reger, T. D. Wright, C. A. Little, J. J. S. Lamba and M. D. Smith, *Inorg. Chem.*, 2001, **40**, 3810-3814.
- S2. M. Mewald, R. Frohlich, and M. Oestreich, *Chem.-Eur. J.*, 2011, **17**, 9406-9414.
- S3. C. Wang, G. Erker, G. Kehr, K. Wedeking and R. Frohlich, *Organometallics*, 2005, **24**, 4760-4773.
- S4. C. J. Schaverien and J. B. Vanmechelen, *Organometallics*, 1991, **10**, 1704-1709.
- S5. J.A.B. Abdalla, I.M. Riddlestone, R. Tirfoin and S.Aldridge, *Angew. Chem. Int. Ed.*, 2015, **54**, 5098-5102.
- S6. A. Adamcyk-Woźniak, M. Jakubczyk, A. Sporzyński and G. Żukowska, *Inorg. Chem. Commun.*, 2011, **14**, 1753-1755.
- S7. A.D. Becke, *Phys. Rev. A*, 1988, **38**, 3098-3100.
- S8. J.P. Perdew, *Phys. Rev. B*, 1986, **33**, 8822-8824.
- S9. J.G. Snijders, P. Vernooijs and E.J. Baerends, *Atomic Data and Nuclear Data Tables*, 1982, **26**, 483-509.
